# Supplementary material for: A transgene design for enhancing oil content in Arabidopsis and Camelina seeds
Source: PubMed Central journal article supplement (PMC5820799; doi:10.1186/s13068-018-1049-4), 2018-02-21
Supplement: 13068_2018_1049_MOESM1_ESM.pdf [file 13068_2018_1049_MOESM1_ESM.pdf]

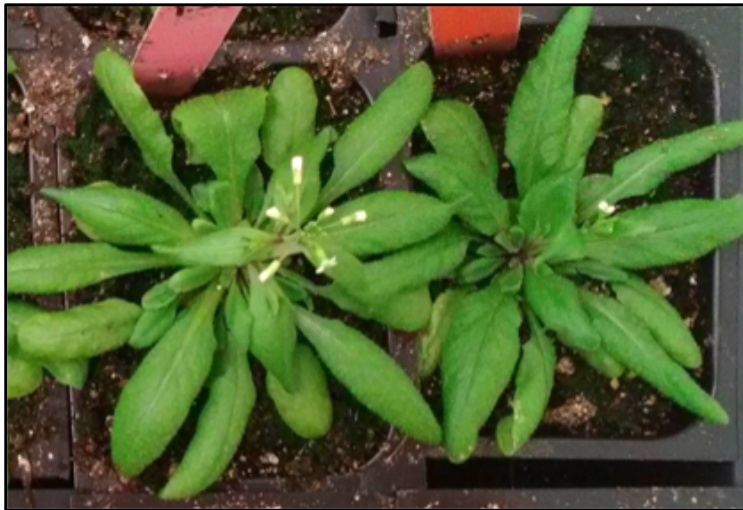

ATSL5

Wild type

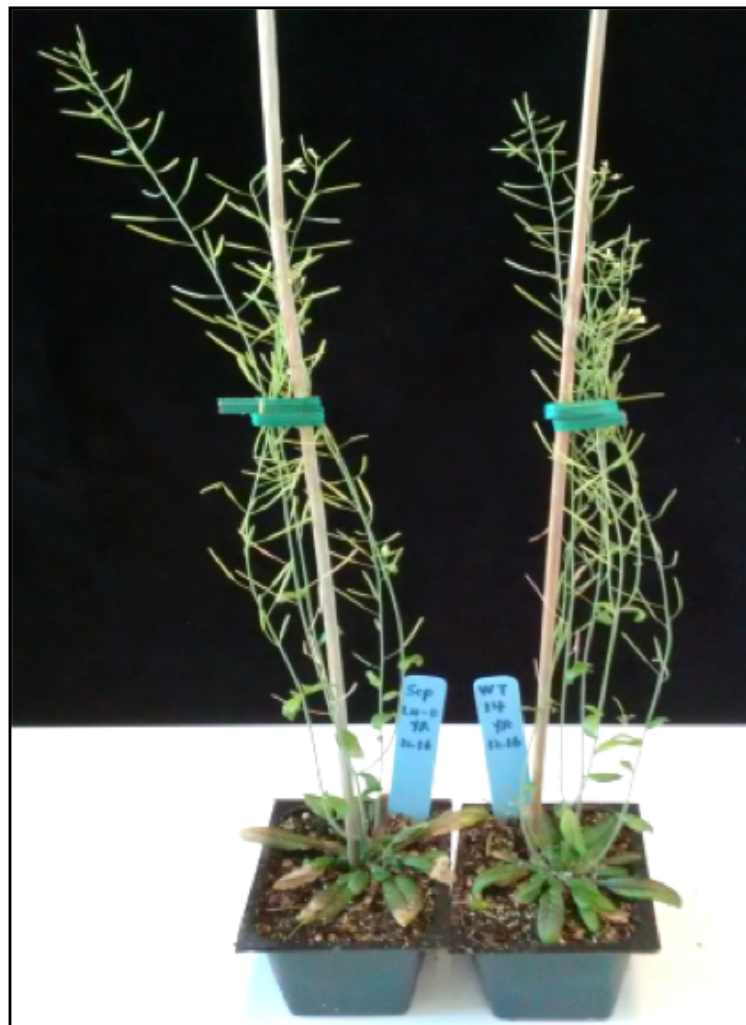

ATSL4

Wild type

**Additional File 1: Phenotypes of arabidopsis *pSCP17:ZmLEC1* and Col-0 wild type.** The plants in rosette stage are T2 generation and the mature plants are T3 generation.
