# Supplementary material for: A transgene design for enhancing oil content in Arabidopsis and Camelina seeds
Source: PubMed Central journal article supplement (PMC5820799; doi:10.1186/s13068-018-1049-4), 2018-02-21
Supplement: 13068_2018_1049_MOESM2_ESM.pdf [file 13068_2018_1049_MOESM2_ESM.pdf]

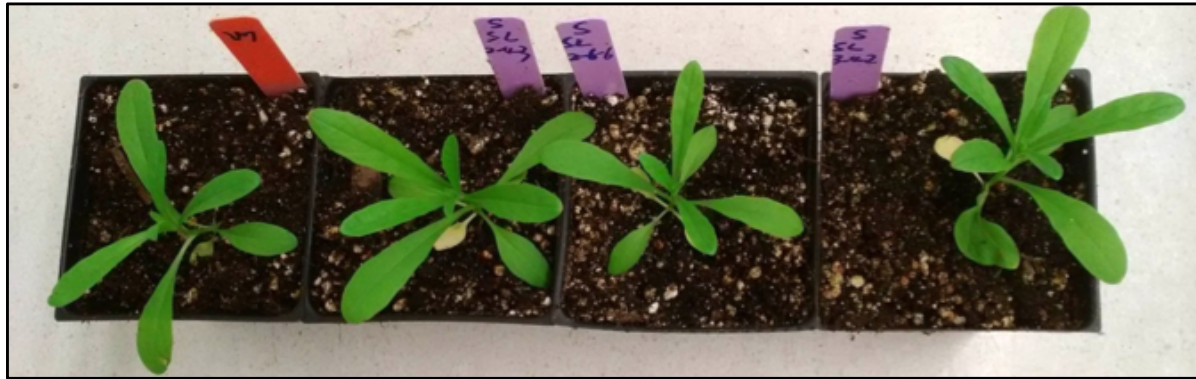

WT

CsSL2

CsSL2

CsSL1

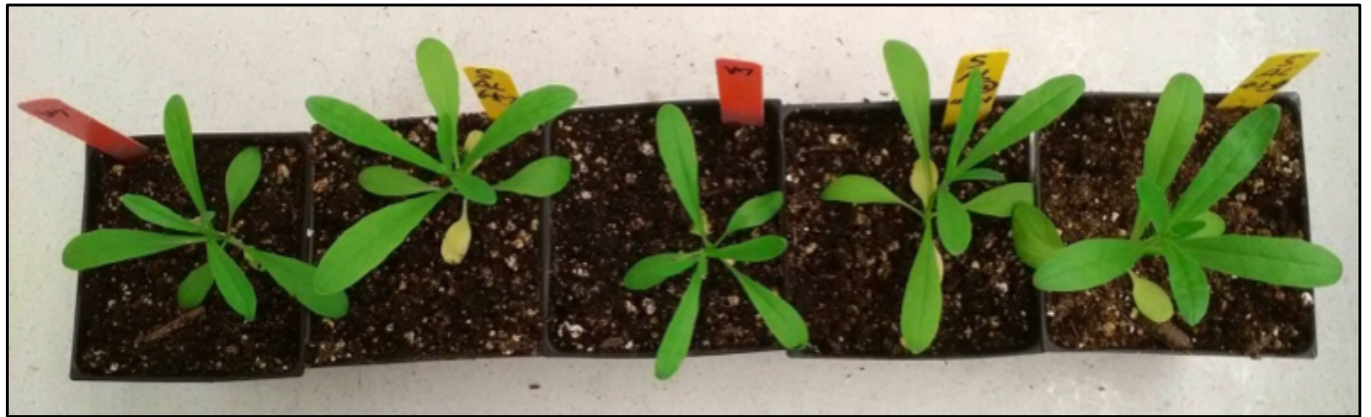

WT

CsAL6

WT

CsAL1

CsAL4

**Additional File 2: Phenotypes of 45-days-old T3 and wild type (WT) Camelina plants.**
