# Supplementary material for: A transgene design for enhancing oil content in Arabidopsis and Camelina seeds
Source: PubMed Central journal article supplement (PMC5820799; doi:10.1186/s13068-018-1049-4), 2018-02-21
Supplement: 13068_2018_1049_MOESM3_ESM.pdf [file 13068_2018_1049_MOESM3_ESM.pdf]

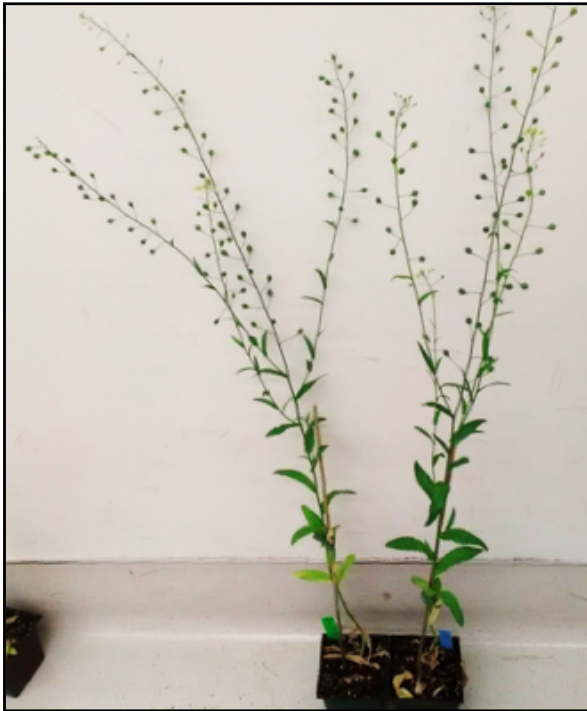

CsAL3 WT

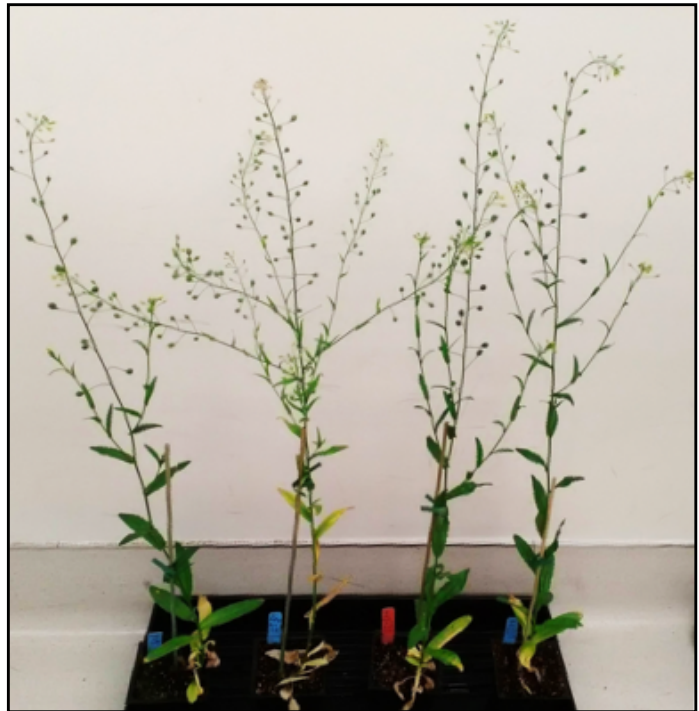

WT CsAL3 CsSL2 CsSL5

**Additional File 3: Phenotypes of mature T3 and wild type (WT) Camelina plants.**
