# Supplementary material for: A transgene design for enhancing oil content in Arabidopsis and Camelina seeds
Source: PubMed Central journal article supplement (PMC5820799; doi:10.1186/s13068-018-1049-4), 2018-02-21
Supplement: 13068_2018_1049_MOESM4_ESM.pdf [file 13068_2018_1049_MOESM4_ESM.pdf]

## Additional File 4

### Details of primers used.

| Primer name                                                     | Gene name       | Primer sequence (5'-3')                           |
|-----------------------------------------------------------------|-----------------|---------------------------------------------------|
| Primer sequences for cloning                                    |                 |                                                   |
| pSCP F                                                          | <i>SCP17</i>    | CCAAGCTTGGAAGAGCTCTTCTCTGGCTGTG                   |
| pSCP R                                                          |                 | GACCTAGGTCTCTTTGATCAAAAGTTTTT                     |
| pACP F                                                          | <i>ACP5</i>     | CCAAGCTTGCATACTCTCTCGTGAACTC                      |
| pACP R                                                          |                 | GACCTAGGTATCGATCTGATCGAGAG                        |
| ZmLEC1 F                                                        | <i>LEC1</i>     | GATGCCAAAGGGAGCAGAGA                              |
| ZmLEC1 R                                                        |                 | CCCCTTGCATCACCCCTCAAA                             |
| F-Spect-pA6-SacII                                               | <i>SpecR</i>    | ccgattttgaaaccgcgCATGATATATCTCCCAATTTGTG          |
| R-Spect-pA6-SacII                                               | <i>SpecR</i>    | ctgcctgtgatcaccgcgTAAGCCTCGTTCGGTTCGT             |
| F-Basta-pA6-ApaI                                                | <i>BastaR</i>   | ctcggtagcaagctggggcgccGATACATGAGAATTAAG<br>GGAGTC |
| R-Basta-pA6-AseI                                                | <i>BastaR</i>   | ctgaattaacgccgaattaatGAGCTTGCATGCCGGTCGATC        |
| Housekeeping gene primers in Arabidopsis                        |                 |                                                   |
| SAND F                                                          | <i>SAND</i>     | AACTCTATGCAGCATTTGATCCACT                         |
| SAND R                                                          |                 | TGATTGCATATCTTTATCGCCATC                          |
| PP2AA3 F                                                        | <i>PP2AA3</i>   | TAACGTGGCCAAAATGATGC                              |
| PP2AA3 R                                                        |                 | GTTCTCCACAACCGCTTGGT                              |
| ER332                                                           |                 | GAGCTGAAGTGGCTTCCATGAC                            |
| ER333                                                           |                 | GGTCCGACATACCCATGATCC                             |
| Primers for semi-quantitative / quantitative PCR of Arabidopsis |                 |                                                   |
| AtACC1 F                                                        | <i>AtACC1</i>   | AGTGAGAATGCATAGGTTGGG                             |
| AtACC1 R                                                        |                 | CTCGGTATATGTGGACAGTGC                             |
| AtBCCP2 F                                                       | <i>AtBCCP2</i>  | GACCCGGTGAACCCCCT                                 |
| AtBCCP2 R                                                       |                 | GTCAACGCTGACTGGTTTTCCAT                           |
| AtPDHE1C F                                                      | <i>AtPDHE1C</i> | ATGTGTGCTCAAATGTATTACCGAGGC                       |
| AtPDHE1T R                                                      |                 | ACCTTTGCTGAGGGCATGG                               |
| AtSUS2 F                                                        | <i>AtSUS2</i>   | GCGGGAAGCAAGAACAATG                               |
| AtSUS2 R                                                        |                 | GAACAACCTCGGTAAAGACCAGGC                          |

---

Housekeeping gene primers in *Camelina*

|                  |                                 |                                 |
|------------------|---------------------------------|---------------------------------|
| CsActin F        | <i>CsActin</i>                  | ACA ATT TCC CGC TCT GCT GTT GTG |
| CsActin R        |                                 | AGG GTT TCT CTC TTC CAC ATG CCA |
| CsTubulin F      | <i>CsTubulin</i>                | GGGCTAAGGGACATTACACTG           |
| CsTubulin R      |                                 | GTGTTCCCATACCAGATCCAG           |
| CsEF1 $\alpha$ F | <i>CsEF1<math>\alpha</math></i> | GGTAAGGAGATTGAGAAGGAGC          |
| CsEF1 $\alpha$ R |                                 | CACAGCAAAACGTCCCAATG            |

---

Primers for semi-quantitative / quantitative PCR of *Camelina*

|            |                 |                        |
|------------|-----------------|------------------------|
| CsACC1 F   | <i>CsACC1</i>   | CTAAGCCCTGAAGACTACGAAC |
| CsACC1 R   |                 | ATTACCCACCTTGTTTCCCC   |
| CsBCCP2 F  | <i>CsBCCP2</i>  | ACACAGTGGCATCTCCTTTC   |
| CsBCCP2 R  |                 | GGTTTTGGCTTTTCCGTTTCAG |
| CsPDHE1T F | <i>CsPDHE1T</i> | TGGAGAATAACTTGTGGGCG   |
| CsPDHE1A R |                 | ACCTTCAACACATCCATACCG  |
| CsSUS2 F   | <i>CsSUS2</i>   | CGTTTGCTACTTGTCATGGTG  |
| CsSUS2 R   |                 | TTACCCAGTGATTCCGGATTGG |

---
